# Supplementary material for: Tethered DNA hairpins facilitate electrochemical detection of DNA ligation
Source: Royal Society of Chemistry journal article supplement (doi:10.1039/b413556c), 2005-01-01
Supplement: b413556c.pdf [file b413556c.pdf]

## SUPPORTING INFORMATION

### Tethered DNA Hairpins Facilitate Electrochemical Detection of DNA Ligation

#### HPLC Characterisation of Oligonucleotides

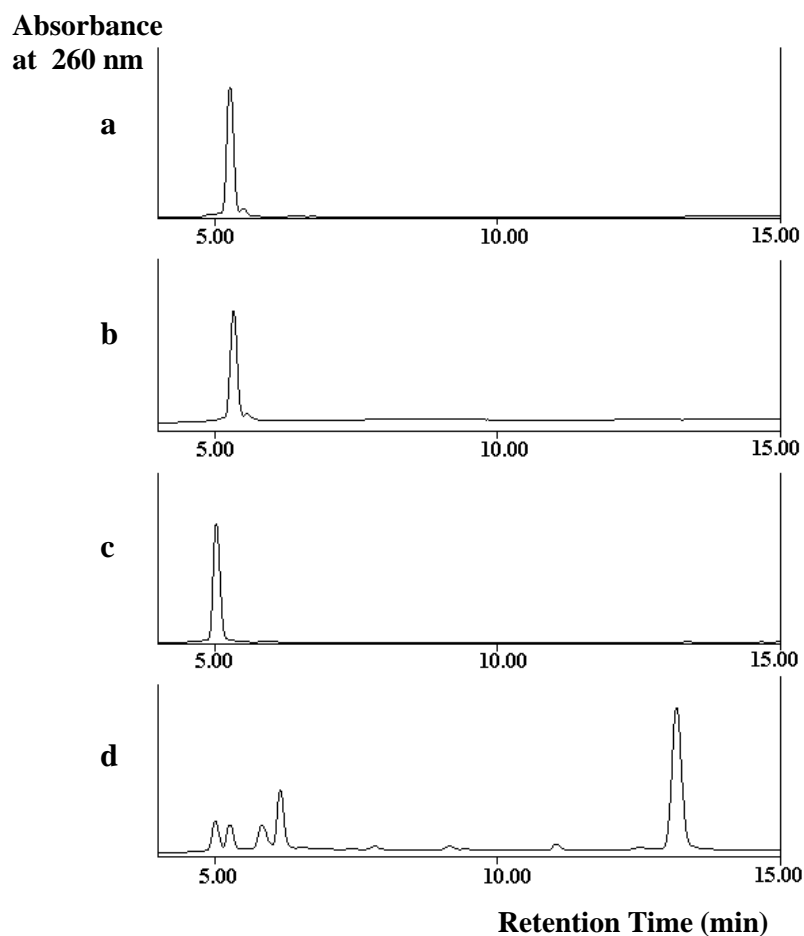

Reverse phase HPLC characterisation of products from the reaction of oligonucleotides **D** and **E** with ferrocene carboxylic acid N-succinimide ester (FNHS). Chromatograms for oligonucleotide **D** prior to (a) and after (b) incubation with FNHS and for oligonucleotide **E** prior to (c) and after (d) incubation with FNHS.
